# Supplementary material
Source: PubMed Central journal article supplement (PMC6900986)
Supplement: NIHMS1058430-supplement-SI_001.pdf [file NIHMS1058430-supplement-SI_001.pdf]

# Supporting Information

## A Blinded Testing of Function Annotation for uPE1 Proteins by the I-TASSER/COFACTOR Pipeline Using the 2018-2019 Additions to neXtProt and CAFA3 Challenge

*Chengxin Zhang, Lydie Lane, Gilbert S. Omenn, and Yang Zhang*

### Table of Contents

|                                                                                                                                                                                                                    |           |
|--------------------------------------------------------------------------------------------------------------------------------------------------------------------------------------------------------------------|-----------|
| <b>Text S1.</b> Retrieval of Fmax data for CAFA3 human targets .....                                                                                                                                               | <b>S1</b> |
| <b>Figure S1.</b> Graphic explanation of Fmax .....                                                                                                                                                                | <b>S2</b> |
| <b>Figure S2.</b> Fmax versus features of target protein in time-elapsd set of 8 and 22 proteins with MF and BP GO terms by UniProt/neXtProt .....                                                                 | <b>S3</b> |
| <b>Figure S3.</b> I-TASSER model of JMJD7 its native structure and two template structures .....                                                                                                                   | <b>S4</b> |
| <b>Figure S4.</b> Three copies of I-TASSER models of TTC39B superposed to three subunits of Apc/C .....                                                                                                            | <b>S5</b> |
| <b>Table S1.</b> Comparison of our function annotation by I-TASSER/COFACTOR and by UniProt/neXtProt curation for the 25 uPE1 proteins with newly provided function annotation in neXtProt release 2019-01-11 ..... | <b>S6</b> |

**Text S1.** Retrieval of Fmax data for CAFA3 human targets. For Figure 2 in the main text, we plot the Fmax values of COFACTOR (Zhang-Freddolino lab), Naïve and BLAST using supplementary data accompanying the CAFA3 report ([https://figshare.com/articles/Supplementary\\_data/8135393](https://figshare.com/articles/Supplementary_data/8135393)). Within the above-mentioned CAFA3 supplementary data folder, the six spreadsheets for these Fmax values are located within supplementary\_data/cafa3/sheets/ and have the following filenames:

mfo\_HUMAN\_type1\_mode1\_all\_fmax\_sheet.csv

mfo\_HUMAN\_type2\_mode1\_all\_fmax\_sheet.csv

bpo\_HUMAN\_type1\_mode1\_all\_fmax\_sheet.csv

bpo\_HUMAN\_type2\_mode1\_all\_fmax\_sheet.csv

cco\_HUMAN\_type1\_mode1\_all\_fmax\_sheet.csv

cco\_HUMAN\_type2\_mode1\_all\_fmax\_sheet.csv

In the filenames, “type1” and “type2” are for “No knowledge” and “Limited Knowledge” targets, respectively. In each spreadsheet, the performance of COFACTOR (Zhang-Freddolino Lab), Naïve and BLAST are identified by the “M138”, “BN7U”, and “BB7U” labels, respectively. We did not show the performance of other CAFA3 teams because we were not informed of their respective labels in the spreadsheets, due to restrictions imposed by CAFA data anonymity policy.

For Figure 3, the Fmax for each target is calculated using ground truth GO terms listed under the cafa3/benchmark20171115.tar.

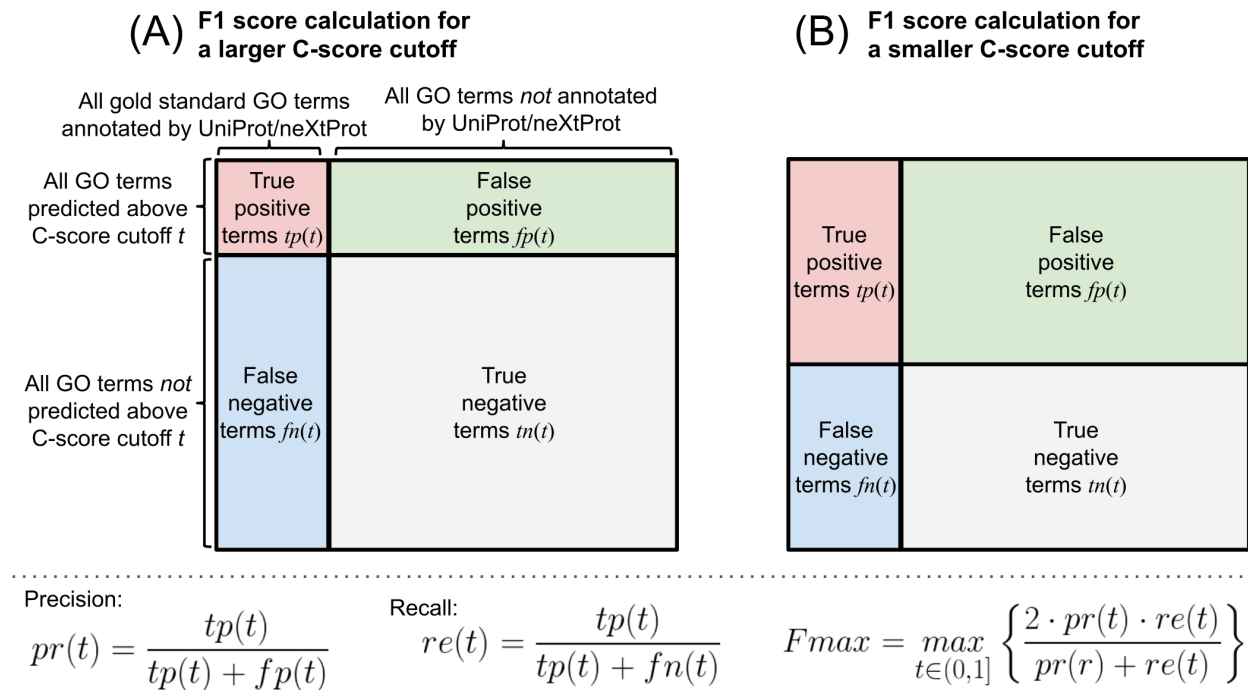

**Figure S1. (A)** Graphic explanation of Fmax, the standard metric for evaluating the overlap between of the set of predicted GO terms (the two red and green rectangles on the top) and the set of ground-truth GO terms (usually being experimental annotations in UniProt/neXtProt, the two red and cyan rectangles on the left). The big square represents all possible GO terms. Precision is the portion of predicted GO terms that are correct (the set of ground-truth GO terms), and recall is the portion of ground-truth standard terms that are predicted. **(B)** For the same protein, the set of “predicted” GO terms depends on the C-score cutoff  $t$  ranging between 0 and 1, and less stringent cutoff (smaller  $t$  value) results in larger set of predicted terms (bigger area for the two rectangles on the top), which makes both precision and recall dependent on the C-score cutoff  $t$  as well. The harmonic average of precision and recall is called F1 score, whose maximum over the entire range of  $t$  is Fmax.

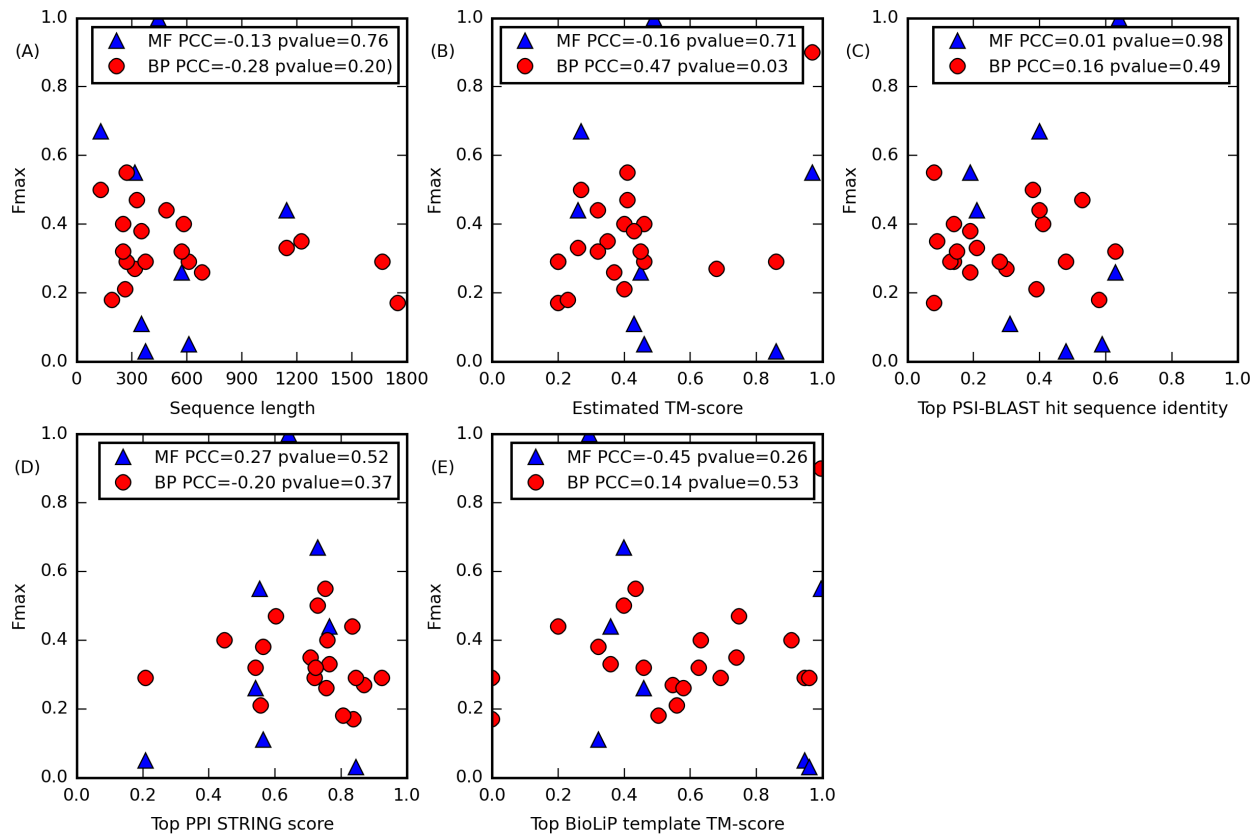

**Figure S2.** Fmax versus features of target protein in time-elapsed set of 8 and 22 proteins with MF and BP GO terms by UniProt/neXtProt. Inside each figure legend, the two numbers are the Pearson's correlation coefficient (PCC) between Fmax and target protein feature, followed by the *p*-value of PCC.

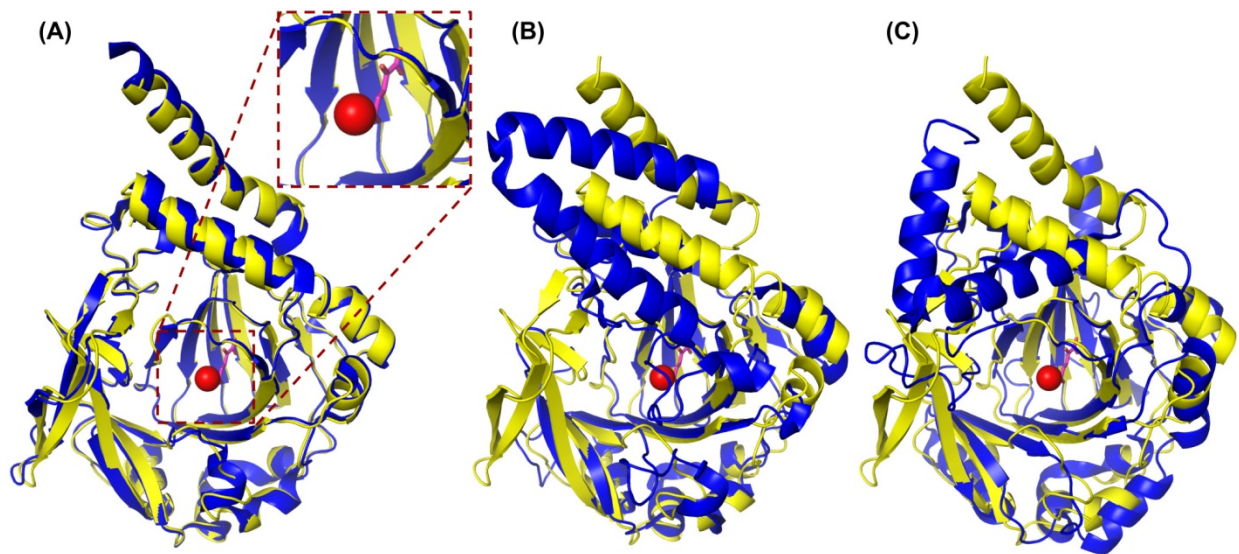

**Figure S3.** I-TASSER model of human JMJD7 (yellow cartoon) superposed to (A) its native structure (PDB ID 5nfn Chain A), (B) a human tRNA hydrolase (PDB ID 3a15 Chain B), and (C) a human hypoxia-inducible factor-asparagine dioxygenase (PDB ID 4b7e Chain A) in yellow blue cartoons. The JMJD7 ligand binding site (dashed inset) shows the COFACTOR predicted ligands, including Fe<sup>2+</sup> ion (red sphere) and 2-oxoglutarate (magenta stick), both of which are known to participate in the catalytic activity of JMJD7.

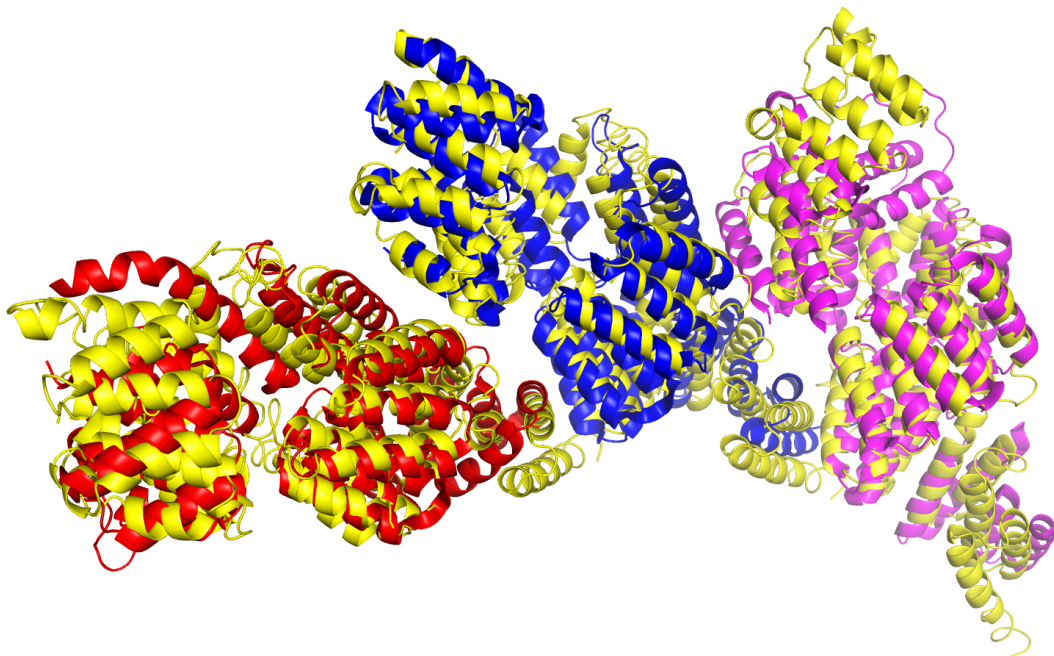

**Figure S4.** I-TASSER model of TTC39B (yellow cartoons) superposed to three subunits of Apc/C (5a31 Chain F, J, P in red, blue, and magenta cartoons, respectively) with TM-scores ranging from 0.66 to 0.76. Subunits of this complex are involved in regulation and catalysis of protein ubiquitination.

**Table S1.** Comparison of our function annotation by I-TASSER/COFACTOR and by UniProt/neXtProt curation for the 25 uPE1 proteins with newly provided function annotation in neXtProt release 2019-01-11.

- (a) An asterisk (\*) marks a target if our free-text annotation (see below) matches neXtProt free text annotation (obtained from release 2019-01-11). For each target, we manually assign a free-text annotation based on specific GO term predicted by our automatic I-TASSER/COFACTOR pipeline. #2, 3, 4, 7, 10, 11, 15, 19, 23 are marked by asterisks.
- (b) A plus (+) marks a target whose Fmax for either MF or BP is >0.5 but the free-text annotation does not match. Fmax for MF/BP quantitatively measures the consistency between COFACTOR predicted GO terms and neXtProt curated GO terms. "NA", or not applicable, means neXtProt did not assign GO term for a target. #6 is marked by a plus. The table is ranked in descending order of Fmax.
- (c) Since there are usually many GO terms predicted for a target protein by our pipeline, we only show the GO term used to derive our free-text annotation. The criteria for selection of these GO terms are explained in “Manual free-text function interpretation” section in the main text. These GO terms are not necessarily the same as the set of GO terms for Fmax calculation, which are shown at <https://zhanglab.ccmb.med.umich.edu/COFACTOR2/nx2019addition/GOterm.html#2>. Due to page limitation, the full set of predicted GO terms for each target is available separately at <https://zhanglab.ccmb.med.umich.edu/COFACTOR/nx2019addition/GOterm.html#3>.
- (d) In the last column, phrases at top are free-text annotations, followed by MF and BP GO terms. Red shades indicate free-text phrases consistent between I-TASSER/COFACTOR prediction and neXtProt annotation.

| # | Accession, Gene (Chromosome) | Match | Estimated TM-score | Fmax MF/BP   | I-TASSER/COFACTOR prediction                                                                                                                                                                                                                    | neXtProt annotation                                                                                                                                                                                                                                    |
|---|------------------------------|-------|--------------------|--------------|-------------------------------------------------------------------------------------------------------------------------------------------------------------------------------------------------------------------------------------------------|--------------------------------------------------------------------------------------------------------------------------------------------------------------------------------------------------------------------------------------------------------|
| 1 | Q96M27-1, PRRC1 (Chr5)       | *     | 0.49               | 1.00<br>0.88 | Protein kinase A regulation<br>== MF ==<br>GO:0034237 0.65 protein kinase A regulatory subunit binding<br>== BP ==<br>GO:0001934 0.67 positive regulation of protein phosphorylation<br>GO:0034199 0.65 activation of protein kinase A activity | Activation of protein kinase A activity. Protein binding. Protein kinase A regulatory subunit binding.<br>==== MF ====<br>GO:0034237 protein kinase A regulatory subunit binding<br>==== BP ====<br>GO:0034199 activation of protein kinase A activity |

|   |                                 |   |      |               |                                                                                                                                                                                                                                                                                                                                                                                                                    |                                                                                                                                                                                                                                                                                                                                                                                                                                                                                                                                                                                                                                                                                                                                                                                                                                                                                                                                                                                                                                                                                                                                                                                                                     |
|---|---------------------------------|---|------|---------------|--------------------------------------------------------------------------------------------------------------------------------------------------------------------------------------------------------------------------------------------------------------------------------------------------------------------------------------------------------------------------------------------------------------------|---------------------------------------------------------------------------------------------------------------------------------------------------------------------------------------------------------------------------------------------------------------------------------------------------------------------------------------------------------------------------------------------------------------------------------------------------------------------------------------------------------------------------------------------------------------------------------------------------------------------------------------------------------------------------------------------------------------------------------------------------------------------------------------------------------------------------------------------------------------------------------------------------------------------------------------------------------------------------------------------------------------------------------------------------------------------------------------------------------------------------------------------------------------------------------------------------------------------|
| 2 | P0C870-1,<br>JMJD7<br>(Chr15)   | * | 0.97 | 0.55,<br>0.90 | <p><b>Histone demethylation</b><br/> == MF ==<br/> GO:0016706 0.76 2-oxoglutarate-dependent dioxygenase activity<br/> GO:0032452 0.63 histone demethylase activity<br/> GO:0003682 0.51 chromatin binding<br/> == BP ==<br/> GO:0016570 0.53 histone modification</p>                                                                                                                                              | <p>Bifunctional enzyme that acts both as an endopeptidase and 2-oxoglutarate-dependent monooxygenase. Endopeptidase that cleaves histones N-terminal tails at the carboxyl side of methylated arginine or lysine residues, to generate 'tailless nucleosomes', which may trigger transcription elongation. Preferentially recognizes and cleaves monomethylated and dimethylated arginine residues of histones H2, H3 and H4. After initial cleavage, continues to digest histones tails via its aminopeptidase activity. Additionally, may play a role in protein biosynthesis by modifying the translation machinery. Acts as Fe2+ and 2-oxoglutarate-dependent monooxygenase, catalyzing (S)-stereospecific hydroxylation at C-3 of 'Lys-22' of DRG1 and 'Lys-21' of DRG2 translation factors (TRAFAC), promoting their interaction with ribonucleic acids (RNA).<br/> ==== MF ====<br/> GO:0016706 2-oxoglutarate-dependent dioxygenase activity<br/> GO:0004177 aminopeptidase activity<br/> GO:0004175 endopeptidase activity<br/> GO:0046872 metal ion binding<br/> GO:0035064 methylated histone binding<br/> GO:0004497 monooxygenase activity<br/> ==== BP ====<br/> GO:0018126 protein hydroxylation</p> |
| 3 | Q7Z5A7-1,<br>FAM19A5<br>(Chr22) | * | 0.27 | 0.67,<br>0.50 | <p><b>Regulation of microglial cell activation</b><br/> == BP ==<br/> GO:0031347 0.67 regulation of defense response<br/> GO:0002682 0.67 regulation of immune system process<br/> GO:1903980 0.66 positive regulation of microglial cell activation<br/> GO:1903979 0.66 negative regulation of microglial cell activation</p>                                                                                    | <p>Acts as a chemokine-like protein by regulating cell proliferation and migration through activation of G protein-coupled receptors (GPCRs), such as S1PR2 and FPR2. Stimulates chemotactic migration of macrophages mediated by the MAPK3/ERK1 and AKT1 pathway. Blocks TNFSF11/RANKL-induced osteoclast formation from macrophages by inhibiting up-regulation of osteoclast fusogenic and differentiation genes. Stimulation of macrophage migration and inhibition of osteoclast formation is mediated via GPCR FPR2. Acts as an adipokine by negatively regulating vascular smooth muscle cell (VSMC) proliferation and migration in response to platelet-derived growth factor stimulation via GPCR S1PR2 and G protein GNA12/GNA13-transmitted RHOA signaling. Inhibits injury-induced cell proliferation and neointima formation in the femoral arteries<br/> ==== MF ====<br/> GO:0005125 cytokine activity<br/> ==== BP ====<br/> GO:0010469 regulation of signaling receptor activity</p>                                                                                                                                                                                                               |
| 4 | Q5T0D9-1,<br>TPRG1L<br>(Chr1)   | + | 0.41 | NA,<br>0.55   | <p>Phosphatidylinositol-4-phosphate phosphatase<br/> == MF ==<br/> GO:0034596 0.70 phosphatidylinositol phosphate 4-phosphatase activity<br/> GO:0052833 0.68 inositol monophosphate 4-phosphatase activity<br/> == BP ==<br/> GO:0048015 0.70 phosphatidylinositol-mediated signaling<br/> GO:0046856 0.70 phosphatidylinositol dephosphorylation<br/> GO:0031161 0.70 phosphatidylinositol catabolic process</p> | <p>Presynaptic protein involved in the synaptic transmission tuning. Regulates synaptic release probability by decreasing the calcium sensitivity of release<br/> ==== BP ====<br/> GO:0051966 regulation of synaptic transmission, glutamatergic</p>                                                                                                                                                                                                                                                                                                                                                                                                                                                                                                                                                                                                                                                                                                                                                                                                                                                                                                                                                               |



|   |                                 |   |      |               |                                                                                                                                                                                                                                                                                                                                                                                                                                                                                                            |                                                                                                                                                                                                                                                                                                                                                                                                                                                                                                                                                                                                                                                                                                                                                                                                                                                                                                                                                                                                                                                                                                                              |
|---|---------------------------------|---|------|---------------|------------------------------------------------------------------------------------------------------------------------------------------------------------------------------------------------------------------------------------------------------------------------------------------------------------------------------------------------------------------------------------------------------------------------------------------------------------------------------------------------------------|------------------------------------------------------------------------------------------------------------------------------------------------------------------------------------------------------------------------------------------------------------------------------------------------------------------------------------------------------------------------------------------------------------------------------------------------------------------------------------------------------------------------------------------------------------------------------------------------------------------------------------------------------------------------------------------------------------------------------------------------------------------------------------------------------------------------------------------------------------------------------------------------------------------------------------------------------------------------------------------------------------------------------------------------------------------------------------------------------------------------------|
| 5 | Q96D15-1,<br>RCN3 (Chr19)       |   | 0.41 | NA,<br>0.47   | Catalytic activity, acting on a protein<br>== MF ==<br>GO:0140096 0.41 catalytic activity,<br>acting on a protein                                                                                                                                                                                                                                                                                                                                                                                          | Probable molecular chaperone assisting protein biosynthesis and transport in the endoplasmic reticulum. Required for the proper biosynthesis and transport of pulmonary surfactant-associated protein A/SP-A, pulmonary surfactant-associated protein D/SP-D and the lipid transporter ABCA3. By regulating both the proper expression and the degradation through the endoplasmic reticulum-associated protein degradation pathway of these proteins plays a crucial role in pulmonary surfactant homeostasis. Has an anti-fibrotic activity by negatively regulating the secretion of type I and type III collagens. This calcium-binding protein also transiently associates with immature PCSK6 and regulates its secretion.<br>==== BP ====<br>GO:0009306 protein secretion<br>GO:0010952 positive regulation of peptidase activity<br>GO:0015031 protein transport<br>GO:0032964 collagen biosynthetic process<br>GO:0036503 ERAD pathway<br>GO:0043129 surfactant homeostasis<br>GO:0051896 regulation of protein kinase B signaling<br>GO:0055091 phospholipid homeostasis<br>GO:0060428 lung epithelium development |
| 6 | Q8WTR8-1,<br>NTN5 (Chr19)       | * | 0.32 | NA,<br>0.44   | Anatomical structure morphogenesis<br>== BP ==<br>GO:0048856 0.66 anatomical structure development<br>GO:0009653 0.63 anatomical structure morphogenesis<br>GO:0007411 0.48 axon guidance<br>GO:0051960 0.45 regulation of nervous system development<br>GO:0050767 0.44 regulation of neurogenesis<br>GO:0045664 0.43 regulation of neuron differentiation<br>GO:0010975 0.42 regulation of neuron projection development<br>GO:0010769 0.41 regulation of cell morphogenesis involved in differentiation | Plays a role in neurogenesis. Prevents motor neuron cell body migration out of the neural tube.<br>==== BP ====<br>GO:0022008 neurogenesis                                                                                                                                                                                                                                                                                                                                                                                                                                                                                                                                                                                                                                                                                                                                                                                                                                                                                                                                                                                   |
| 7 | Q9C0D6-1,<br>FHDC1 (Chr4)       | * | 0.26 | 0.44,<br>0.33 | Binding of cytoskeleton<br>== MF ==<br>GO:0008092 0.70 cytoskeletal protein binding<br>== CC ==<br>GO:0044430 0.47 cytoskeletal part                                                                                                                                                                                                                                                                                                                                                                       | Microtubule-associated formin which regulates both actin and microtubule dynamics. Induces microtubule acetylation and stabilization and actin stress fiber formation. Regulates Golgi ribbon formation. Required for normal cilia assembly.<br>==== MF ====<br>GO:0003779 actin binding<br>GO:0008017 microtubule binding<br>==== BP ====<br>GO:0043149 stress fiber assembly<br>GO:0060271 cilium assembly<br>GO:0090161 Golgi ribbon formation                                                                                                                                                                                                                                                                                                                                                                                                                                                                                                                                                                                                                                                                            |
| 8 | 075363-1,<br>BCAS1<br>(Chr20)   |   | 0.46 | NA,<br>0.40   | (for CC: neuron part)<br>== CC ==<br>GO:0097458 0.42 neuron part                                                                                                                                                                                                                                                                                                                                                                                                                                           | Required for myelination.<br>==== BP ====<br>GO:0042552 myelination                                                                                                                                                                                                                                                                                                                                                                                                                                                                                                                                                                                                                                                                                                                                                                                                                                                                                                                                                                                                                                                          |
| 9 | P60827-1,<br>C1QTNF8<br>(Chr16) | * | 0.40 | NA,<br>0.40   | Signaling receptor binding                                                                                                                                                                                                                                                                                                                                                                                                                                                                                 | May play a role as ligand of relaxin receptor RXFP1.<br>==== BP ====<br>GO:2000147 positive regulation of cell motility                                                                                                                                                                                                                                                                                                                                                                                                                                                                                                                                                                                                                                                                                                                                                                                                                                                                                                                                                                                                      |

|    |                                 |      |               |                                                                                                                                                                                                                                                                                                         |                                                                                                                                                                                                                                                                                                                                                                                                                                                                                                                                                                                                                                                                                                                                                                                                                                           |
|----|---------------------------------|------|---------------|---------------------------------------------------------------------------------------------------------------------------------------------------------------------------------------------------------------------------------------------------------------------------------------------------------|-------------------------------------------------------------------------------------------------------------------------------------------------------------------------------------------------------------------------------------------------------------------------------------------------------------------------------------------------------------------------------------------------------------------------------------------------------------------------------------------------------------------------------------------------------------------------------------------------------------------------------------------------------------------------------------------------------------------------------------------------------------------------------------------------------------------------------------------|
| 10 | Q8IU3-1,<br>GRAMD2A<br>(Chr15)  | 0.43 | 0.11,<br>0.38 | <p>Binding of GTPase from Ras superfamily<br/>== MF ==<br/>GO:0017016 0.63 Ras GTPase binding<br/>GO:0005096 0.62 GTPase activator activity<br/>GO:0017137 0.61 Rab GTPase binding<br/>== BP ==<br/>GO:0043087 0.74 regulation of GTPase activity<br/>GO:0090630 0.73 activation of GTPase activity</p> | <p>Participates in the organization of endoplasmic reticulum-plasma membrane contact sites (EPCS) with pleiotropic functions including STIM1 recruitment and calcium homeostasis. Constitutive tether that co-localize with ESYT2/3 tethers at endoplasmic reticulum-plasma membrane contact sites in a phosphatidylinositol lipid-dependent manner. Pre-marks the subset of phosphatidylinositol 4,5-bisphosphate (PI(4,5)P2)-enriched EPCS destined for the store operated calcium entry pathway (SOCE).<br/>==== MF ====<br/>GO:0005546 phosphatidylinositol-4,5-bisphosphate binding<br/>GO:0035091 phosphatidylinositol binding<br/>==== BP ====<br/>GO:0061817 endoplasmic reticulum-plasma membrane tethering<br/>GO:2001256 regulation of store-operated calcium entry</p>                                                        |
| 11 | Q9BZH6-1,<br>WDR11<br>(Chr10)   | 0.35 | NA,<br>0.35   |                                                                                                                                                                                                                                                                                                         | <p>Involved in the Hedgehog (Hh) signaling pathway, is essential for normal ciliogenesis. Regulates the proteolytic processing of GLI3 and cooperates with the transcription factor EMX1 in the induction of downstream Hh pathway gene expression and gonadotropin-releasing hormone production. WDR11 complex facilitates the tethering of Adaptor protein-1 complex (AP-1)-derived vesicles. WDR11 complex acts together with TBC1D23 to facilitate the golgin-mediated capture of vesicles generated using AP-1.<br/>==== BP ====<br/>GO:0006886 intracellular protein transport<br/>GO:0007507 heart development<br/>GO:0008589 regulation of smoothened signaling pathway<br/>GO:0035264 multicellular organism growth<br/>GO:0060271 cilium assembly<br/>GO:0060322 head development<br/>GO:0099041 vesicle tethering to Golgi</p> |
| 12 | Q6ZNE9-2,<br>RUFY4 (Chr2)       | 0.45 | 0.26,<br>0.32 | <p>Regulation of protein folding<br/>== MF ==<br/>GO:0051082 0.44 unfolded protein binding<br/>GO:0044183 0.44 protein binding involved in protein folding<br/>== BP ==<br/>GO:0061077 0.51 chaperone-mediated protein folding<br/>GO:0006458 0.51 'de novo' protein folding</p>                        | <p>Positively regulates macroautophagy in primary dendritic cells. Increases autophagic flux, probably by stimulating both autophagosome formation and facilitating tethering with lysosomes. Binds to phosphatidylinositol 3-phosphate (PtdIns3P) through its FYVE-type zinc finger.<br/>==== MF ====<br/>GO:0032266 phosphatidylinositol-3-phosphate binding<br/>==== BP ====<br/>GO:0000045 autophagosome assembly<br/>GO:0016239 positive regulation of macroautophagy<br/>GO:0071353 cellular response to interleukin-4</p>                                                                                                                                                                                                                                                                                                          |
| 13 | Q9GZU8-1,<br>FAM192A<br>(Chr16) | 0.32 | NA,<br>0.32   | <p>Hydrolase, probably hydrolase of protein<br/>== MF ==<br/>GO:0016787 0.53 hydrolase activity<br/>GO:0140096 0.48 catalytic activity, acting on a protein<br/>== BP ==<br/>GO:0019538 0.50 protein metabolic process</p>                                                                              | <p>Promotes the association of the proteasome activator complex subunit PSME3 with the 20S proteasome and regulates its activity. Inhibits PSME3-mediated degradation of some proteasome substrates, probably by affecting their diffusion rate into the catalytic chamber of the proteasome<br/>==== BP ====<br/>GO:0032091 negative regulation of protein binding<br/>GO:1901799 negative regulation of proteasomal protein catabolic process</p>                                                                                                                                                                                                                                                                                                                                                                                       |

|    |                                |   |      |               |                                                                                                                                                                                                                                                                                                                                                                                                                                                                                                                                                                                                                                                                                       |                                                                                                                                                                                                                                                                                                                                                                                                                                                                                                                                                                                                                                                                                                                                                     |
|----|--------------------------------|---|------|---------------|---------------------------------------------------------------------------------------------------------------------------------------------------------------------------------------------------------------------------------------------------------------------------------------------------------------------------------------------------------------------------------------------------------------------------------------------------------------------------------------------------------------------------------------------------------------------------------------------------------------------------------------------------------------------------------------|-----------------------------------------------------------------------------------------------------------------------------------------------------------------------------------------------------------------------------------------------------------------------------------------------------------------------------------------------------------------------------------------------------------------------------------------------------------------------------------------------------------------------------------------------------------------------------------------------------------------------------------------------------------------------------------------------------------------------------------------------------|
| 14 | Q494U1-1,<br>PLEKHN1<br>(Chr1) |   | 0.46 | 0.05,<br>0.29 | Transmembrane transport of small molecules, such as nucleotide<br>== MF ==<br>GO:0008028 0.59 monocarboxylic acid transmembrane transporter activity<br>== BP ==<br>GO:0015780 0.53 nucleotide-sugar transmembrane transport<br>== CC ==<br>GO:0016020 0.62 membrane                                                                                                                                                                                                                                                                                                                                                                                                                  | Controls the stability of the leptin mRNA harboring an AU-rich element (ARE) in its 3' UTR, in cooperation with the RNA stabilizer ELAVL1<br>==== MF ====<br>GO:0001786 phosphatidylserine binding<br>GO:0070300 phosphatidic acid binding<br>GO:1901612 cardiolipin binding<br>GO:1901981 phosphatidylinositol phosphate binding<br>==== BP ====<br>GO:0001666 response to hypoxia<br>GO:0043065 positive regulation of apoptotic process<br>GO:0061158 3'-UTR-mediated mRNA destabilization                                                                                                                                                                                                                                                       |
| 15 | Q8IUW5-1,<br>RELL1 (Chr4)      | * | 0.20 | NA,<br>0.29   | Regulation of apoptosis through TNF<br>== MF ==<br>GO:0005031 0.40 tumor necrosis factor-activated receptor activity<br>== BP ==<br>GO:0097190 0.51 apoptotic signaling pathway<br>GO:0042981 0.51 regulation of apoptotic process<br>GO:0042127 0.51 regulation of cell proliferation<br>GO:0006955 0.51 immune response<br>GO:0006954 0.51 inflammatory response                                                                                                                                                                                                                                                                                                                    | Induces activation of MAPK14/p38 cascade, when overexpressed<br>==== BP ====<br>GO:1900745 positive regulation of p38MAPK cascade                                                                                                                                                                                                                                                                                                                                                                                                                                                                                                                                                                                                                   |
| 16 | Q8NDM7-1,<br>CFAP43<br>(Chr10) |   | 0.20 | NA,<br>0.29   |                                                                                                                                                                                                                                                                                                                                                                                                                                                                                                                                                                                                                                                                                       | Flagellar protein involved in sperm flagellum axoneme organization and function.<br>==== BP ====<br>GO:0007288 sperm axoneme assembly                                                                                                                                                                                                                                                                                                                                                                                                                                                                                                                                                                                                               |
| 17 | Q8TDG2-1,<br>ACTRT1<br>(ChrX)  |   | 0.86 | 0.03,<br>0.29 | Regulation of chromosome organization either through histone acetylation or binding of cytoskeleton used in chromosome segregation<br>== MF ==<br>GO:0004402 0.61 histone acetyltransferase activity<br>GO:0008092 0.59 cytoskeletal protein binding<br>== BP ==<br>GO:0006325 0.64 chromatin organization<br>GO:0018193 0.61 peptidyl-amino acid modification<br>GO:0016570 0.61 histone modification<br>GO:0016573 0.60 histone acetylation<br>GO:0006281 0.60 DNA repair<br>GO:0000916 0.59 actomyosin contractile ring contraction<br>GO:0006355 0.53 regulation of transcription, DNA-templated<br>== CC ==<br>GO:0005856 0.66 cytoskeleton<br>GO:0044430 0.60 cytoskeletal part | Negatively regulates the Hedgehog (SHH) signaling. Binds to the promoter of the SHH signaling mediator, GLI1, and inhibits its expression.<br>==== MF ====<br>GO:0003682 chromatin binding<br>==== BP ====<br>GO:0008589 regulation of smoothened signaling pathway<br>GO:0045892 negative regulation of transcription, DNA-templated                                                                                                                                                                                                                                                                                                                                                                                                               |
| 18 | 075677-1,<br>RFPL1<br>(Chr22)  | * | 0.68 | NA,<br>0.27   | Ubiquitin-protein transferase activity<br>== MF ==<br>GO:0004842 0.78 ubiquitin-protein transferase activity<br>== BP ==<br>GO:0016567 0.55 protein ubiquitination                                                                                                                                                                                                                                                                                                                                                                                                                                                                                                                    | Negatively regulates the G2-M phase transition, possibly by promoting cyclin B1/CCNB1 and CDK1 proteasomal degradation and thereby preventing their accumulation during interphase.<br>==== BP ====<br>GO:0007049 cell cycle<br>GO:0008285 negative regulation of cell proliferation<br>GO:0010972 negative regulation of G2/M transition of mitotic cell cycle<br>GO:0032436 positive regulation of proteasomal ubiquitin-dependent protein catabolic process<br>GO:0043065 positive regulation of apoptotic process<br>GO:0045930 negative regulation of mitotic cell cycle<br>GO:0051782 negative regulation of cell division<br>GO:2001272 positive regulation of cysteine-type endopeptidase activity involved in execution phase of apoptosis |

|    |                                |   |      |             |                                                                                                                                                                                                                                                                                                                                                                                                                                                                                                                                                                                                                                                      |                                                                                                                                                                                                                                                                                                                                                                                                                                                                                                                                                                                                                                                                                                                                          |
|----|--------------------------------|---|------|-------------|------------------------------------------------------------------------------------------------------------------------------------------------------------------------------------------------------------------------------------------------------------------------------------------------------------------------------------------------------------------------------------------------------------------------------------------------------------------------------------------------------------------------------------------------------------------------------------------------------------------------------------------------------|------------------------------------------------------------------------------------------------------------------------------------------------------------------------------------------------------------------------------------------------------------------------------------------------------------------------------------------------------------------------------------------------------------------------------------------------------------------------------------------------------------------------------------------------------------------------------------------------------------------------------------------------------------------------------------------------------------------------------------------|
| 19 | Q5VTQ0-1,<br>TTC39B<br>(Chr9)  | * | 0.37 | NA,<br>0.26 | <p>Protein ubiquitination regulation<br/> == MF ==<br/> GO:0019899 0.52 enzyme binding<br/> == BP ==<br/> GO:0006508 0.52 proteolysis<br/> GO:0016567 0.50 protein ubiquitination<br/> GO:0051603 0.49 proteolysis involved in cellular protein catabolic process<br/> GO:0043632 0.49 modification-dependent macromolecule catabolic process</p>                                                                                                                                                                                                                                                                                                    | <p>Regulates high density lipoprotein (HDL) cholesterol metabolism by promoting the ubiquitination and degradation of the oxysterols receptors LXR (NR1H2 and NR1H3).<br/> ==== BP ====<br/> GO:0006629 lipid metabolic process<br/> GO:0010874 regulation of cholesterol efflux<br/> GO:0010887 negative regulation of cholesterol storage<br/> GO:0042632 cholesterol homeostasis<br/> GO:0090181 regulation of cholesterol metabolic process</p>                                                                                                                                                                                                                                                                                      |
| 20 | Q96S16-1,<br>JMJD8<br>(Chr16)  |   | 0.40 | NA,<br>0.21 | <p>Histone demethylation<br/> == MF ==<br/> GO:0016705 0.87 oxidoreductase activity, acting on paired donors, with incorporation or reduction of molecular oxygen<br/> GO:0016706 0.79 2-oxoglutarate-dependent dioxygenase activity<br/> GO:0032452 0.75 histone demethylase activity<br/> GO:0003682 0.50 chromatin binding<br/> == BP ==<br/> GO:0018193 0.63 peptidyl-amino acid modification<br/> GO:0006325 0.63 chromatin organization<br/> GO:0016570 0.61 histone modification<br/> GO:0016577 0.52 histone demethylation<br/> == CC ==<br/> GO:0005634 0.86 nucleus<br/> GO:0044428 0.79 nuclear part<br/> GO:0005654 0.61 nucleoplasm</p> | <p>Functions as a positive regulator of TNF-induced NF-kappa-B signaling. Regulates angiogenesis and cellular metabolism through interaction with PKM.<br/> ==== BP ====<br/> GO:0006110 regulation of glycolytic process<br/> GO:0043123 positive regulation of I-kappaB kinase/NF-kappaB signaling<br/> GO:1903302 regulation of pyruvate kinase activity<br/> GO:1903672 positive regulation of sprouting angiogenesis</p>                                                                                                                                                                                                                                                                                                            |
| 21 | Q9H9L7-1,<br>AKIRIN1<br>(Chr1) |   | 0.23 | NA,<br>0.18 | <p>By binding to RNA polymerase, regulate expression of genes such as cytokines<br/> == MF ==<br/> GO:0019899 0.77 enzyme binding<br/> == BP ==<br/> GO:0045944 1.00 positive regulation of transcription by RNA polymerase II<br/> GO:0001819 0.68 positive regulation of cytokine production<br/> GO:0032755 0.67 positive regulation of interleukin-6 production<br/> == CC ==<br/> GO:0005634 1.00 nucleus</p>                                                                                                                                                                                                                                   | <p>Functions as signal transducer for MSTN during skeletal muscle regeneration and myogenesis. May regulate chemotaxis of both macrophages and myoblasts by reorganising actin cytoskeleton, leading to more efficient lamellipodia formation via a PI3 kinase dependent pathway.<br/> ==== BP ====<br/> GO:0010592 positive regulation of lamellipodium assembly<br/> GO:0010759 positive regulation of macrophage chemotaxis<br/> GO:0014839 myoblast migration involved in skeletal muscle regeneration<br/> GO:0045663 positive regulation of myoblast differentiation<br/> GO:1902723 negative regulation of skeletal muscle satellite cell proliferation<br/> GO:1902725 negative regulation of satellite cell differentiation</p> |
| 22 | Q96KV7-1,<br>WDR90<br>(Chr16)  |   | 0.20 | NA,<br>0.17 | <p>Regulation of transcription by nucleic acid binding<br/> == MF ==<br/> GO:0140110 0.46 transcription regulator activity<br/> == BP ==<br/> GO:0010468 0.60 regulation of gene expression<br/> GO:0051252 0.58 regulation of RNA metabolic process<br/> GO:0006355 0.57 regulation of transcription, DNA-templated<br/> GO:0006357 0.43 regulation of transcription by RNA polymerase II<br/> == CC ==<br/> GO:0005634 0.75 nucleus<br/> GO:0044428 0.56 nuclear part</p>                                                                                                                                                                          | <p>Required for efficient primary cilium formation.<br/> ==== BP ====<br/> GO:0060271 cilium assembly</p>                                                                                                                                                                                                                                                                                                                                                                                                                                                                                                                                                                                                                                |
| 23 | Q6AI39-1,<br>BICRAL<br>(Chr6)  |   | 0.33 | NA,<br>NA   | <p>Sodium:potassium ion transporter<br/> == MF ==<br/> GO:0005391 0.54 sodium:potassium-exchanging ATPase activity<br/> == BP ==<br/> GO:0010248 0.54 establishment or maintenance of transmembrane electrochemical gradient<br/> == CC ==<br/> GO:0005886 0.55 plasma membrane</p>                                                                                                                                                                                                                                                                                                                                                                  | <p>Component of SWI/SNF chromatin remodeling subcomplex GBAF that carries out key enzymatic activities, changing chromatin structure by altering DNA-histone contacts within a nucleosome in an ATP-dependent manner.</p>                                                                                                                                                                                                                                                                                                                                                                                                                                                                                                                |

|    |                                |      |           |                                                                                                                                                                                                                                                                                                                                                    |                                                                                                                                                                                                                                                                          |
|----|--------------------------------|------|-----------|----------------------------------------------------------------------------------------------------------------------------------------------------------------------------------------------------------------------------------------------------------------------------------------------------------------------------------------------------|--------------------------------------------------------------------------------------------------------------------------------------------------------------------------------------------------------------------------------------------------------------------------|
| 24 | Q96J88-1,<br>EPSTI1<br>(Chr13) | 0.42 | NA,<br>NA | <p>Cytoskeleton binding<br/> == MF ==<br/> GO:0008092 0.43 cytoskeletal protein binding<br/> == BP ==<br/> GO:0007010 0.54 cytoskeleton organization<br/> GO:0032185 0.47 septin cytoskeleton organization<br/> GO:0007017 0.47 microtubule-based process<br/> == CC ==<br/> GO:0044430 0.55 cytoskeletal part</p>                                 | Plays a role in M1 macrophage polarization and is required for the proper regulation of gene expression during M1 versus M2 macrophage differentiation. Might play a role in RELA/p65 and STAT1 phosphorylation and nuclear localization upon activation of macrophages. |
| 25 | Q9BZD6-1,<br>PRRG4<br>(Chr11)  | 0.32 | NA,<br>NA | <p>Serine-type endopeptidase<br/> == MF ==<br/> GO:0070011 0.89 peptidase activity, acting on L-amino acid peptides<br/> GO:0004175 0.84 endopeptidase activity<br/> GO:0008236 0.79 serine-type peptidase activity<br/> GO:0004252 0.74 serine-type endopeptidase activity<br/> == BP ==<br/> GO:0030193 0.56 regulation of blood coagulation</p> | May control axon guidance across the CNS. Prevents the delivery of ROBO1 at the cell surface and downregulates its expression.                                                                                                                                           |
